# Supplementary material
Source: publisher site journal article supplement (https://www.dovepress.com/article/566403)
Supplement: Supplementary file 2 [file 566403 Supplementary Material 2.pdf › 566403 Supplementary Material 2.pdf]

## Supplementary Material 2. Raw data

| Patient Number | Survey date | Have you ever received the influenza vaccine or pneumonia vaccine to prevent acute exacerbations of COPD? | Received the influenza vaccine within the past year |
|----------------|-------------|-----------------------------------------------------------------------------------------------------------|-----------------------------------------------------|
| 4401040        | 2023-08-01  | 0                                                                                                         | 0                                                   |
| 3601150        | 2022-12-23  | 0                                                                                                         | 0                                                   |
| 3601146        | 2022-12-17  | 0                                                                                                         | 0                                                   |
| 44010050       | 2023-10-17  | 0                                                                                                         | 0                                                   |
| 44010049       | 2023-10-17  | 0                                                                                                         | 0                                                   |
| 44010048       | 2023-09-26  | 1                                                                                                         | 1                                                   |
| 44010047       | 2023-09-18  | 0                                                                                                         | 0                                                   |
| 44010046       | 2023-09-02  | 0                                                                                                         | 0                                                   |
| 44010045       | 2023-09-02  | 0                                                                                                         | 0                                                   |
| 44010044       | 2023-08-28  | 0                                                                                                         | 0                                                   |
| 44010043       | 2023-08-26  | 0                                                                                                         | 0                                                   |
| 44010042       | 2023-08-22  | 0                                                                                                         | 0                                                   |
| 4401041        | 2023-08-22  | 0                                                                                                         | 0                                                   |
| 4401040        | 2023-08-01  | 0                                                                                                         | 0                                                   |
| 4401039        | 2023-08-01  | 0                                                                                                         | 0                                                   |
| 4401038        | 2023-06-26  | 0                                                                                                         | 0                                                   |
| 4401037        | 2023-06-20  | 0                                                                                                         | 0                                                   |
| 4401036        | 2023-06-10  | 0                                                                                                         | 0                                                   |
| 4401035        | 2023-06-10  | 0                                                                                                         | 0                                                   |
| 4401034        | 2023-05-24  | 0                                                                                                         | 0                                                   |
| 4401033        | 2023-05-24  | 0                                                                                                         | 0                                                   |
| 4401032        | 2023-05-24  | 0                                                                                                         | 0                                                   |
| 4401031        | 2023-06-07  | 0                                                                                                         | 0                                                   |
| 4401030        | 2023-05-20  | 0                                                                                                         | 0                                                   |
| 4401029        | 2023-05-16  | 0                                                                                                         | 0                                                   |
| 4401028        | 2023-05-06  | 0                                                                                                         | 0                                                   |
| 4401027        | 2023-05-06  | 0                                                                                                         | 0                                                   |
| 4401025        | 2023-04-27  | 0                                                                                                         | 0                                                   |
| 4401024        | 2023-04-27  | 0                                                                                                         | 0                                                   |
| 4401023        | 2023-04-27  | 0                                                                                                         | 0                                                   |
| 4401022        | 2023-04-27  | 0                                                                                                         | 0                                                   |
| 4401021        | 2023-04-19  | 0                                                                                                         | 0                                                   |
| 4401026        | 2023-05-05  | 0                                                                                                         | 0                                                   |
| 4401020        | 2023-04-19  | 0                                                                                                         | 0                                                   |
| 4401019        | 2023-04-17  | 0                                                                                                         | 0                                                   |
| 4401018        | 2023-04-17  | 0                                                                                                         | 0                                                   |
| 4401017        | 2023-04-15  | 0                                                                                                         | 0                                                   |
| 4401016        | 2023-04-06  | 0                                                                                                         | 0                                                   |
| 4401015        | 2023-04-05  | 0                                                                                                         | 0                                                   |
| 4401014        | 2023-04-05  | 0                                                                                                         | 0                                                   |
| 4401013        | 2023-04-04  | 0                                                                                                         | 0                                                   |
| 4401012        | 2023-04-10  | 0                                                                                                         | 0                                                   |
| 4401011        | 2023-04-03  | 0                                                                                                         | 0                                                   |
| 4401010        | 2023-03-29  | 0                                                                                                         | 0                                                   |
| 4401009        | 2023-03-28  | 0                                                                                                         | 0                                                   |
| 4401007        | 2023-03-24  | 0                                                                                                         | 0                                                   |
| 4401006        | 2023-03-25  | 0                                                                                                         | 0                                                   |
| 4401005        | 2023-03-23  | 0                                                                                                         | 0                                                   |
| 4401004        | 2023-03-21  | 0                                                                                                         | 0                                                   |
| 4401008        | 2023-03-25  | 1                                                                                                         | 0                                                   |
| 4401003        | 2023-03-24  | 0                                                                                                         | 0                                                   |
| 4401002        | 2023-03-16  | 0                                                                                                         | 0                                                   |
| 4401001        | 2023-03-15  | 0                                                                                                         | 0                                                   |
| 1101003        | 2022-10-12  | 0                                                                                                         | 0                                                   |
| 1101005        | 2022-10-14  | 0                                                                                                         | 0                                                   |

|         |            |   |   |
|---------|------------|---|---|
| 1101007 | 2023-02-06 | 0 | 0 |
| 1201100 | 2023-10-26 | 0 | 0 |
| 1201099 | 2023-10-26 | 0 | 0 |
| 1201098 | 2023-10-21 | 0 | 0 |
| 1201097 | 2023-10-21 | 1 | 1 |
| 1201096 | 2023-10-21 | 0 | 0 |
| 1201095 | 2023-10-19 | 0 | 0 |
| 1201094 | 2023-09-27 | 0 | 0 |
| 1201093 | 2023-09-28 | 1 | 1 |
| 1201092 | 2023-09-30 | 1 | 1 |
| 1201091 | 2023-09-25 | 0 | 0 |
| 1201090 | 2023-10-04 | 0 | 0 |
| 1201089 | 2023-09-09 | 1 | 0 |
| 1201088 | 2023-09-09 | 0 | 0 |
| 1201087 | 2023-09-09 | 0 | 0 |
| 1201086 | 2023-08-07 | 0 | 0 |
| 1201085 | 2023-10-17 | 1 | 1 |
| 1201084 | 2023-08-05 | 1 | 1 |
| 1201083 | 2023-08-04 | 0 | 0 |
| 1201082 | 2023-08-05 | 0 | 0 |
| 1201081 | 2023-07-30 | 0 | 0 |
| 1201080 | 2023-07-30 | 0 | 0 |
| 1201079 | 2023-07-30 | 0 | 0 |
| 1201078 | 2023-07-30 | 0 | 0 |
| 1201077 | 2023-07-18 | 0 | 0 |
| 1201076 | 2023-07-18 | 0 | 0 |
| 1201075 | 2023-07-12 | 0 | 0 |
| 1201074 | 2023-07-12 | 0 | 0 |
| 1201072 | 2023-07-03 | 0 | 0 |
| 1201071 | 2023-06-22 | 0 | 0 |
| 1201061 | 2023-04-17 | 0 | 0 |
| 1201062 | 2023-05-20 | 0 | 0 |
| 1201063 | 2023-05-20 | 0 | 0 |
| 1201064 | 2023-05-20 | 0 | 1 |
| 1201065 | 2023-05-20 | 0 | 0 |
| 1201066 | 2023-06-12 | 1 | 1 |
| 1201070 | 2023-06-18 | 0 | 1 |
| 1201069 | 2023-06-18 | 0 | 0 |
| 1201068 | 2023-06-12 | 0 | 0 |
| 1201067 | 2023-06-12 | 0 | 0 |
| 1201073 | 2023-07-12 | 1 | 1 |
| 1201060 | 2023-04-20 | 0 | 0 |
| 1201059 | 2023-04-11 | 0 | 0 |
| 1201058 | 2023-04-11 | 0 | 0 |
| 1201057 | 2023-04-10 | 1 | 1 |
| 1201056 | 2023-04-06 | 0 | 0 |
| 1201055 | 2023-03-28 | 0 | 0 |
| 1201054 | 2023-03-28 | 0 | 0 |
| 1201053 | 2023-03-28 | 0 | 0 |
| 1201052 | 2023-03-28 | 0 | 0 |
| 1201051 | 2023-03-28 | 0 | 0 |
| 1201050 | 2023-03-28 | 0 | 0 |
| 1201049 | 2023-03-28 | 0 | 0 |
| 1201048 | 2023-03-18 | 1 | 1 |
| 1201047 | 2023-03-18 | 1 | 1 |
| 1201046 | 2023-03-19 | 0 | 0 |
| 1201045 | 2023-03-19 |   |   |
| 1201044 | 2023-03-19 | 0 | 0 |
| 1201043 | 2023-03-19 |   |   |

|         |            |   |   |
|---------|------------|---|---|
| 1201041 | 2023-03-09 |   |   |
| 1201042 | 2023-03-12 | 0 | 0 |
| 1201040 | 2023-03-09 | 0 | 0 |
| 1201039 | 2023-03-09 | 0 | 0 |
| 1201038 | 2023-03-09 | 0 | 0 |
| 1201037 | 2023-03-12 | 0 | 0 |
| 1201036 | 2023-03-12 | 1 | 1 |
| 1201035 | 2023-02-27 |   |   |
| 1201034 | 2023-03-07 | 1 | 0 |
| 1201033 | 2023-03-07 |   |   |
| 1201032 | 2023-03-07 | 0 | 0 |
| 1201031 | 2023-03-03 | 1 | 1 |
| 1201030 | 2023-03-06 | 0 | 0 |
| 1201029 | 2023-03-03 | 0 | 0 |
| 1201028 | 2023-03-03 | 0 | 0 |
| 1201027 | 2022-11-18 | 0 | 0 |
| 1201026 | 2022-11-18 | 1 | 1 |
| 1201025 | 2022-11-18 | 1 | 1 |
| 1201024 | 2022-11-15 | 0 | 0 |
| 1201023 | 2022-11-12 | 0 | 0 |
| 1201022 | 2022-11-12 | 0 | 0 |
| 1201021 | 2022-11-14 | 0 | 0 |
| 1201020 | 2022-11-12 | 0 | 0 |
| 1201019 | 2022-10-31 | 0 | 0 |
| 1201018 | 2022-10-31 | 0 | 0 |
| 1201017 | 2022-10-31 | 0 | 0 |
| 1201016 | 2022-10-19 | 0 | 0 |
| 1201015 | 2022-10-19 | 0 | 0 |
| 1201014 | 2022-10-19 | 0 | 0 |
| 1201013 | 2022-10-19 | 0 | 0 |
| 1201012 | 2022-10-13 | 0 | 0 |
| 1201011 | 2022-10-13 | 0 | 0 |
| 1201010 | 2023-03-12 |   |   |
| 1201007 | 2022-11-16 | 0 | 0 |
| 1201006 | 2022-11-11 |   |   |
| 1201005 | 2022-11-07 | 0 | 0 |
| 1201004 | 2022-10-06 | 0 | 0 |
| 1201003 | 2022-10-10 | 1 | 1 |
| 1201001 | 2022-10-10 | 0 | 0 |
| 1201008 | 2022-12-07 | 0 | 0 |
| 1201002 |            | 0 | 0 |
| 1201009 | 2022-12-25 | 0 | 0 |
| 1301075 | 2023-06-03 | 1 | 1 |
| 1301074 | 2023-06-02 | 0 | 0 |
| 1301073 | 2023-06-10 | 1 | 1 |
| 1301071 | 2023-06-08 |   |   |
| 1301070 | 2023-06-03 | 1 | 1 |
| 1301069 | 2023-05-22 | 0 | 0 |
| 1301067 | 2023-05-13 |   |   |
| 1301066 | 2023-05-04 |   |   |
| 1301065 | 2023-05-12 | 0 | 0 |
| 1301063 | 2023-05-04 |   |   |
| 1301056 | 2023-02-25 | 0 | 0 |
| 1301060 | 2023-04-28 | 0 | 0 |
| 1301055 | 2022-11-28 | 0 | 0 |
| 1301053 | 2022-11-22 | 1 | 1 |
| 1301049 | 2022-11-19 | 0 | 0 |
| 1301048 | 2020-11-19 | 1 | 0 |
| 4301073 | 2023-05-26 | 0 | 0 |

|         |            |   |   |
|---------|------------|---|---|
| 4301081 | 2023-06-10 | 1 | 0 |
| 4301080 | 2023-06-09 | 0 | 0 |
| 4301072 | 2023-05-25 | 0 | 0 |
| 4301079 | 2023-06-08 | 0 | 0 |
| 4301071 | 2023-05-25 | 0 | 0 |
| 4301078 | 2023-06-08 | 0 | 0 |
| 4301077 | 2023-06-08 | 1 | 0 |
| 4301070 | 2023-05-20 | 1 | 0 |
| 4301076 | 2023-06-07 | 0 | 0 |
| 4301061 | 2023-05-10 | 0 | 0 |
| 4301060 | 2023-05-10 | 1 | 1 |
| 4301068 | 2023-05-19 | 0 | 0 |
| 4301059 | 2023-04-28 | 0 | 0 |
| 4301067 | 2023-05-18 | 0 | 0 |
| 4301058 | 2023-04-28 | 0 | 0 |
| 4301065 | 2023-05-16 | 0 | 0 |
| 4301064 | 2023-05-15 | 0 | 0 |
| 4301054 | 2023-04-28 | 1 | 1 |
| 4301063 | 2023-05-14 | 0 | 0 |
| 1301039 | 2022-11-01 | 0 | 0 |
| 4301062 | 2023-05-11 | 0 | 0 |
| 4301069 | 2023-05-20 | 0 | 0 |
| 4301066 | 2023-05-17 | 1 | 0 |
| 1301026 | 2022-10-19 | 0 | 0 |
| 1301018 | 2022-10-09 | 1 | 0 |
| 1301015 | 2022-10-04 | 0 | 0 |
| 1301014 | 2022-10-01 | 0 | 0 |
| 1301013 | 2022-09-30 | 0 | 0 |
| 1301012 | 2022-09-30 | 0 | 0 |
| 1301011 | 2022-09-28 | 0 | 0 |
| 1301010 | 2022-09-27 | 0 | 0 |
| 1301008 | 2022-09-23 | 0 | 0 |
| 1301007 | 2022-09-27 | 1 | 1 |
| 1301006 | 2022-09-26 | 0 | 0 |
| 1301005 | 2022-09-26 | 1 | 1 |
| 4301033 | 2023-03-24 | 1 | 0 |
| 4301053 | 2023-04-26 | 0 | 0 |
| 4301052 | 2023-04-22 | 1 | 1 |
| 4301050 | 2023-04-21 | 0 | 0 |
| 4301057 | 2023-04-28 | 0 | 0 |
| 4301051 | 2023-04-22 | 0 | 0 |
| 4301056 | 2023-04-28 | 0 | 0 |
| 4301055 | 2023-04-28 | 0 | 0 |
| 4301046 | 2023-04-19 | 0 | 0 |
| 4301024 | 2023-03-06 | 1 | 1 |
| 4301047 | 2023-04-20 | 0 | 0 |
| 4301074 | 2023-05-26 | 0 | 0 |
| 4301075 | 2023-05-30 | 1 | 1 |
| 4301048 | 2023-04-20 | 0 | 0 |
| 4301049 | 2023-04-21 | 0 | 0 |
| 4301045 | 2023-04-18 | 0 | 0 |
| 4301043 | 2023-04-15 | 0 | 0 |
| 4301042 | 2023-04-06 | 0 | 0 |
| 4301041 | 2023-04-06 | 0 | 0 |
| 4301040 | 2023-04-06 | 0 | 0 |
| 4301039 | 2023-04-01 | 0 | 0 |
| 4301037 | 2023-04-01 | 1 | 0 |
| 4301036 | 2023-03-27 | 0 | 0 |
| 4301035 | 2023-03-26 | 0 | 0 |

|         |            |   |   |
|---------|------------|---|---|
| 4301034 | 2023-03-26 | 1 | 1 |
| 4301032 | 2023-03-24 | 0 | 0 |
| 4301027 | 2023-03-09 | 1 | 0 |
| 4301026 | 2023-03-09 | 0 | 0 |
| 4301025 | 2023-03-20 | 0 | 0 |
| 4301023 | 2023-03-06 | 0 | 0 |
| 4301022 | 2023-03-06 | 0 | 0 |
| 4301021 | 2023-02-26 | 0 | 0 |
| 4301020 | 2023-02-24 | 0 | 0 |
| 4301019 | 2023-02-26 | 0 | 0 |
| 4301018 | 2023-02-23 | 0 | 0 |
| 4301016 | 2023-02-22 | 1 | 1 |
| 4301015 | 2023-02-16 | 0 | 0 |
| 4301014 | 2023-02-16 | 0 | 0 |
| 4301012 | 2023-02-17 | 0 | 0 |
| 4301011 | 2023-02-03 | 0 | 0 |
| 4301010 | 2022-12-21 | 0 | 0 |
| 4301009 | 2022-12-13 | 1 | 1 |
| 4301030 | 2023-03-14 | 0 | 0 |
| 4301017 | 2023-02-24 | 0 | 0 |
| 4301013 | 2023-02-15 | 0 | 0 |
| 4301044 | 2023-04-15 | 0 | 0 |
| 4301029 | 2023-03-11 | 0 | 0 |
| 4301028 | 2023-03-11 | 0 | 0 |
| 4301038 | 2023-04-03 | 0 | 0 |
| 4301031 | 2023-03-18 | 1 | 0 |
| 1301062 | 2023-05-20 | 0 | 0 |
| 4501058 | 2023-06-05 | 0 | 0 |
| 4501060 | 2023-06-11 | 0 | 0 |
| 4501059 | 2023-06-06 | 0 | 0 |
| 4501057 | 2023-05-30 | 0 | 0 |
| 4501056 | 2023-05-26 | 0 | 0 |
| 4501055 | 2023-05-20 | 0 | 0 |
| 4501052 | 2023-05-14 | 0 | 0 |
| 4501053 | 2023-05-15 | 1 | 1 |
| 4501051 | 2023-05-13 | 0 | 0 |
| 4501054 | 2023-05-16 | 0 | 0 |
| 4501049 | 2023-05-11 | 0 | 0 |
| 4501048 | 2023-05-11 | 0 | 0 |
| 4501046 | 2023-05-10 | 0 | 0 |
| 4501050 | 2023-05-12 | 0 | 0 |
| 1301061 | 2023-04-29 | 0 | 0 |
| 1301059 | 2023-04-18 | 0 | 0 |
| 1301058 | 2023-04-18 | 0 | 0 |
| 1301057 | 2023-02-23 | 1 | 1 |
| 4501047 | 2023-05-11 | 0 | 0 |
| 4501043 | 2023-05-02 | 0 | 0 |
| 3601097 | 2023-03-27 | 0 | 0 |
| 3601086 | 2023-03-16 | 0 | 0 |
| 3601083 | 2023-03-13 | 0 | 0 |
| 3601090 | 2023-03-20 | 0 | 0 |
| 3601082 | 2023-03-13 | 1 | 1 |
| 3601088 | 2023-03-20 | 0 | 0 |
| 3601089 | 2023-03-20 | 0 | 0 |
| 3601098 | 2023-03-27 | 0 | 0 |
| 3601099 | 2023-03-27 | 0 | 0 |
| 3601096 | 2023-03-27 | 0 | 0 |
| 3601095 | 2023-03-27 | 0 | 0 |
| 3601094 | 2023-03-27 | 0 | 0 |

|         |            |   |   |
|---------|------------|---|---|
| 3601093 | 2023-03-23 | 0 | 0 |
| 3601076 | 2023-03-13 | 0 | 0 |
| 3601075 | 2023-03-09 | 0 | 0 |
| 3601087 | 2023-03-20 | 0 | 0 |
| 3601070 | 2023-03-02 | 0 | 0 |
| 3601051 | 2023-02-15 | 0 | 0 |
| 3601069 | 2023-03-02 | 0 | 0 |
| 3601067 | 2023-02-27 | 0 | 0 |
| 3601068 | 2023-02-27 | 0 | 0 |
| 3601092 | 2023-03-23 | 0 | 0 |
| 3601100 | 2023-03-27 | 0 | 0 |
| 3601085 | 2023-03-16 | 0 | 0 |
| 3601077 | 2023-03-13 | 0 | 0 |
| 3601084 | 2023-03-16 | 0 | 0 |
| 3601091 | 2023-03-23 | 0 | 0 |
| 3601078 | 2023-03-13 | 0 | 0 |
| 3601079 | 2023-03-13 | 0 | 0 |
| 3601080 | 2023-03-13 | 0 | 0 |
| 3601081 | 2023-03-13 | 0 | 0 |
| 3601056 | 2023-02-15 | 0 | 0 |
| 3601057 | 2023-02-15 | 0 | 0 |
| 3601058 | 2023-02-15 | 0 | 0 |
| 3601073 | 2023-03-09 | 0 | 0 |
| 3601072 | 2023-03-09 | 0 | 0 |
| 3601074 | 2023-03-09 | 0 | 0 |
| 3601071 | 2023-03-09 | 0 | 0 |
| 3601059 | 2023-02-15 | 0 | 0 |
| 3601066 | 2023-02-27 | 0 | 0 |
| 3601065 | 2023-02-27 | 0 | 0 |
| 3601064 | 2023-02-20 | 0 | 0 |
| 3601063 | 2023-02-20 | 0 | 0 |
| 3601062 | 2023-02-20 | 1 | 1 |
| 3601061 | 2023-02-20 | 0 | 0 |
| 3601060 | 2023-02-20 | 0 | 0 |
| 4501045 | 2023-05-05 | 0 | 0 |
| 4501044 | 2023-05-05 | 0 | 0 |
| 4501042 | 2023-04-21 | 0 | 0 |
| 4501040 | 2023-04-14 | 0 | 0 |
| 4501041 | 2023-04-13 | 0 | 0 |
| 4501039 | 2023-04-11 | 1 | 1 |
| 4502089 | 2023-02-28 | 0 | 0 |
| 3601055 | 2023-02-15 | 0 | 0 |
| 3601054 | 2023-02-15 | 0 | 0 |
| 3601052 | 2023-02-15 | 0 | 0 |
| 3601053 | 2023-02-15 | 0 | 0 |
| 4501035 | 2023-04-08 | 0 | 0 |
| 4501038 | 2023-04-02 | 0 | 0 |
| 4501037 | 2023-04-01 | 0 | 0 |
| 4501036 | 2023-03-30 | 0 | 0 |
| 4501034 | 2023-03-26 | 0 | 0 |
| 4501033 | 2023-03-26 | 0 | 0 |
| 4501032 | 2023-03-25 | 0 | 0 |
| 3601140 | 2022-11-08 | 0 | 0 |
| 3601139 | 2022-11-06 | 0 | 0 |
| 3601138 | 2022-11-18 | 0 | 0 |
| 3601137 | 2022-11-16 | 0 | 0 |
| 3601136 | 2022-11-10 | 0 | 0 |
| 3601135 | 2022-11-17 | 0 | 0 |
| 3601134 | 2022-11-09 | 0 | 0 |

|          |            |   |   |
|----------|------------|---|---|
| 3601133  | 2022-11-20 | 0 | 0 |
| 3601132  | 2022-11-02 | 0 | 0 |
| 3601131  | 2022-11-27 | 0 | 0 |
| 3601130  | 2023-01-10 | 0 | 0 |
| 3601129  | 2023-02-14 | 0 | 0 |
| 3601128  | 2023-02-11 | 0 | 0 |
| 3601127  | 2023-01-13 | 0 | 0 |
| 3601126  | 2023-02-21 | 0 | 0 |
| 3601125  | 2023-02-14 | 0 | 0 |
| 3601124  | 2023-02-23 | 0 | 0 |
| 3601123  | 2022-11-14 | 0 | 0 |
| 3601122  | 2022-10-31 | 0 | 0 |
| 3601121  | 2022-11-04 | 0 | 0 |
| 3601120  | 2022-12-24 | 0 | 0 |
| 3601119  | 2023-02-02 | 0 | 0 |
| 3601118  | 2023-02-16 | 0 | 0 |
| 3601117  | 2022-12-24 | 0 | 0 |
| 3601116  | 2023-02-10 | 0 | 0 |
| 3601115  | 2023-02-13 | 0 | 0 |
| 3601114  | 2023-01-25 | 0 | 0 |
| 3601113  | 2023-01-30 | 0 | 0 |
| 01094133 | 2022-12-23 | 0 | 0 |
| 3601149  | 2022-12-13 | 0 | 0 |
| 3601148  | 2022-11-03 | 0 | 0 |
| 3601112  | 2023-01-07 | 0 | 0 |
| 3601147  | 2022-10-28 | 0 | 0 |
| 3601111  | 2023-01-11 | 0 | 0 |
| 10011997 | 2022-12-17 | 0 | 0 |
| 3601145  | 2023-01-06 | 0 | 0 |
| 3601144  | 2022-11-01 | 0 | 0 |
| 3601110  | 2022-11-23 | 0 | 0 |
| 3601143  | 2022-11-10 | 0 | 0 |
| 3601142  | 2022-11-10 | 0 | 0 |
| 3601109  | 2022-12-04 | 0 | 0 |
| 3601108  | 2022-12-13 | 0 | 0 |
| 3601141  | 2023-01-25 | 0 | 0 |
| 3601106  | 2023-01-30 | 0 | 0 |
| 3601107  | 2022-12-21 | 0 | 0 |
| 3601105  | 2023-01-10 | 0 | 0 |
| 4501029  | 2023-03-23 | 0 | 0 |
| 3601104  | 2022-12-06 | 0 | 0 |
| 3601103  | 2022-11-20 | 0 | 0 |
| 3601102  | 2022-12-13 | 0 | 0 |
| 4501030  | 2023-03-24 | 0 | 0 |
| 4501031  | 2023-03-24 | 0 | 0 |
| 3601101  | 2022-12-04 | 0 | 0 |
| 4502080  | 2023-02-08 | 0 | 0 |
| 4501028  | 2023-03-16 | 0 | 0 |
| 4502077  | 2023-02-15 | 0 | 0 |
| 4501027  | 2023-03-14 | 0 | 0 |
| 4502099  | 2023-03-04 | 0 | 0 |
| 4502097  | 2023-03-03 | 0 | 0 |
| 4502093  | 2023-03-02 | 1 | 1 |
| 4502088  | 2023-02-27 | 0 | 0 |
| 4502062  | 2023-02-02 | 0 | 0 |
| 4502096  | 2023-03-03 | 0 | 0 |
| 4502091  | 2023-03-01 | 0 | 0 |
| 4501025  | 2023-03-02 | 0 | 0 |
| 4501024  | 2023-02-28 | 0 | 0 |

|         |            |   |   |
|---------|------------|---|---|
| 4501026 | 2023-03-02 | 0 | 0 |
| 4502087 | 2023-02-27 | 1 | 1 |
| 4502098 | 2023-03-03 | 0 | 0 |
| 4502095 | 2023-03-02 | 0 | 0 |
| 4502094 | 2023-03-02 | 0 | 0 |
| 4502037 | 2022-12-27 | 0 | 0 |
| 4502084 | 2023-02-24 | 1 | 1 |
| 4502085 | 2023-02-24 | 0 | 0 |
| 4502086 | 2023-02-27 | 1 | 1 |
| 4502090 | 2023-02-28 | 0 | 0 |
| 4502092 | 2023-03-01 | 0 | 0 |
| 4502083 | 2023-02-22 | 0 | 0 |
| 4502082 | 2023-02-22 | 0 | 0 |
| 4502081 | 2023-02-22 | 0 | 0 |
| 4502079 | 2023-02-09 | 1 | 1 |
| 4502078 | 2023-02-15 | 0 | 0 |
| 4502076 | 2023-02-17 | 0 | 0 |
| 4502075 | 2023-02-20 | 0 | 0 |
| 4502074 | 2023-02-20 | 0 | 0 |
| 4502073 | 2023-02-20 | 1 | 1 |
| 4502071 | 2023-02-20 | 0 | 0 |
| 4502072 | 2023-02-20 | 0 | 0 |
| 4502070 | 2023-02-14 | 1 | 1 |
| 4502069 | 2023-02-09 | 0 | 0 |
| 4502068 | 2023-01-31 | 0 | 0 |
| 4502067 | 2023-02-03 | 1 | 0 |
| 4502066 | 2023-01-30 | 0 | 0 |
| 4502065 | 2023-02-03 | 0 | 0 |
| 4502064 | 2023-02-01 | 0 | 0 |
| 4502063 | 2023-03-06 | 0 | 0 |
| 4502061 | 2023-02-03 | 0 | 0 |
| 0       | 2023-01-12 |   |   |
| 4501023 | 2023-02-21 | 0 | 0 |
| 4501022 | 2023-02-18 | 0 | 0 |
| 4501021 | 2023-02-17 | 0 | 0 |
| 4502051 | 2023-02-01 | 0 | 0 |
| 4502057 | 2023-02-10 | 0 | 0 |
| 4502056 | 2023-02-11 | 0 | 0 |
| 4502055 | 2023-02-11 | 0 | 0 |
| 4502054 | 2023-02-11 | 0 | 0 |
| 4502053 | 2023-02-08 | 0 | 0 |
| 4502052 | 2023-02-07 | 0 | 0 |
| 4502048 | 2023-01-29 | 0 | 0 |
| 4502049 | 2023-01-29 | 0 | 0 |
| 4502046 | 2023-01-12 | 0 | 0 |
| 4502045 | 2023-01-11 | 0 | 0 |
| 4502044 | 2023-01-10 | 1 | 1 |
| 4502043 | 2023-01-09 | 1 | 0 |
| 4502042 | 2022-12-30 | 0 | 0 |
| 4502059 | 2023-02-01 | 0 | 0 |
| 4502058 | 2023-02-01 | 0 | 0 |
| 4502050 | 2023-01-31 | 1 | 1 |
| 4502060 | 2023-02-01 | 0 | 0 |
| 4501019 | 2023-01-30 | 0 | 0 |
| 4501018 | 2023-01-27 | 0 | 0 |
| 4501020 | 2023-01-31 | 0 | 0 |
| 1301019 | 2022-10-12 | 1 | 1 |
| 1301027 | 2022-10-22 | 0 | 0 |
| 1301028 | 2022-10-22 | 1 | 1 |

|         |            |   |   |
|---------|------------|---|---|
| 1301020 | 2022-10-13 | 0 | 0 |
| 1301021 | 2022-10-15 | 1 | 0 |
| 1301022 | 2022-10-15 | 1 | 1 |
| 1301023 | 2022-10-17 | 0 | 0 |
| 1301024 | 2022-10-18 | 1 | 1 |
| 1301025 | 2022-10-18 | 1 | 1 |
| 1301041 | 2022-11-05 | 0 | 0 |
| 1301051 | 2022-11-21 | 1 | 1 |
| 1301047 | 2022-11-20 | 0 | 0 |
| 1301050 | 2022-11-20 | 1 | 1 |
| 1301045 | 2022-11-12 | 1 | 1 |
| 1301044 | 2022-11-12 | 1 | 0 |
| 1301042 | 2022-11-08 | 1 | 1 |
| 1301040 | 2022-11-01 | 1 | 1 |
| 1301038 | 2022-10-30 | 1 | 0 |
| 1301016 | 2022-10-04 | 0 | 0 |
| 1301037 | 2022-10-30 | 0 | 0 |
| 1301036 | 2022-10-30 | 1 | 1 |
| 1301035 | 2022-10-29 | 0 | 0 |
| 1301033 | 2022-10-24 | 0 | 0 |
| 1301032 | 2022-10-23 | 0 | 0 |
| 1301031 | 2022-10-23 | 1 | 0 |
| 1301030 | 2022-10-23 | 0 | 0 |
| 1301029 | 2022-10-22 | 0 | 0 |
| 1301034 | 2022-10-29 | 1 | 1 |
| 4502033 | 2022-12-13 | 0 | 0 |
| 4502041 | 2022-12-28 | 0 | 0 |
| 4502040 | 2022-12-28 | 1 | 1 |
| 4502039 | 2022-12-27 | 0 | 0 |
| 4502038 | 2022-12-27 | 0 | 0 |
| 4502028 | 2022-12-07 | 1 | 1 |
| 4501017 | 2022-12-29 | 0 | 0 |
| 4501015 | 2022-12-26 | 0 | 0 |
| 4502047 | 2022-12-27 | 0 | 0 |
| 4501016 | 2022-12-27 | 0 | 0 |
| 4502032 | 2022-12-17 | 0 | 0 |
| 4502031 | 2022-12-17 | 0 | 0 |
| 4502036 | 2022-12-19 | 0 | 0 |
| 4502034 | 2022-12-13 | 0 | 0 |
| 1101006 | 2022-11-08 | 1 | 1 |
| 4501014 | 2022-12-14 | 0 | 0 |
| 4501013 | 2022-12-10 | 0 | 0 |
| 4502035 | 2022-12-13 | 0 | 0 |
| 4502027 | 2022-12-06 | 0 | 0 |
| 4502025 | 2022-12-06 | 0 | 0 |
| 4502026 | 2022-12-06 | 0 | 0 |
| 4502030 | 2022-12-07 | 1 | 0 |
| 4502017 | 2022-11-24 | 0 | 0 |
| 4301008 | 2022-12-07 | 0 | 0 |
| 4502029 | 2022-12-06 | 1 | 1 |
| 4301002 | 2022-10-30 | 0 | 0 |
| 4301001 | 2022-10-25 | 0 | 0 |
| 4301007 | 2022-11-16 | 0 | 0 |
| 4301006 | 2022-11-16 | 0 | 0 |
| 4301005 | 2022-11-09 | 0 | 0 |
| 4301004 | 2022-11-09 | 0 | 0 |
| 4301003 | 2022-11-04 | 1 | 1 |
| 4502022 | 2022-11-30 | 0 | 0 |

|         |            |   |   |
|---------|------------|---|---|
| 4502024 | 2022-12-02 | 0 | 0 |
| 4502023 | 2022-11-30 | 0 | 0 |
| 4501011 | 2022-11-27 | 0 | 0 |
| 4501012 | 2022-11-27 | 0 | 0 |
| 4502021 | 2022-11-30 | 0 | 0 |
| 4502020 | 2022-11-25 | 0 | 0 |
| 4502015 | 2022-11-22 | 1 | 1 |
| 4502012 | 2022-11-21 | 1 | 0 |
| 4501008 | 2022-11-17 | 0 | 0 |
| 4501010 | 2022-11-22 | 0 | 0 |
| 4501009 | 2022-11-22 | 0 | 0 |
| 4502013 | 2022-11-21 | 1 | 1 |
| 4502019 | 2022-11-25 | 0 | 0 |
| 4502016 | 2022-11-22 | 0 | 0 |
| 4502018 | 2022-11-24 | 0 | 0 |
| 1101004 | 2022-10-14 | 0 | 0 |
| 4502008 | 2022-11-17 | 0 | 0 |
| 4502014 | 2022-11-22 | 0 | 0 |
| 1301052 | 2022-11-22 | 1 | 0 |
| 1301054 | 2022-11-23 | 0 | 0 |
| 4502004 | 2022-11-16 | 0 | 0 |
| 4501007 | 2022-11-16 | 0 | 0 |
| 4501006 | 2022-11-16 | 0 | 0 |
| 4502011 | 2022-11-21 | 0 | 0 |
| 4502009 | 2022-11-17 | 0 | 0 |
| 4502006 | 2022-11-16 | 1 | 1 |
| 1301043 | 2022-11-12 | 1 | 1 |
| 4501005 | 2022-11-16 | 0 | 0 |
| 4501002 | 2022-11-08 | 0 | 0 |
| 4502005 | 2022-11-16 | 0 | 0 |
| 4502010 | 2022-11-17 | 0 | 0 |
| 1301009 | 2022-09-28 | 0 | 0 |
| 1301046 | 2022-11-13 | 0 | 0 |
| 4501004 | 2022-11-15 | 0 | 0 |
| 4502002 | 2022-11-01 | 0 | 0 |
| 4502003 | 2022-11-09 | 0 | 0 |
| 4502100 | 2022-10-31 | 1 | 1 |
| 4502001 | 2022-10-31 | 0 | 0 |
| 4502007 | 2022-11-11 | 0 | 0 |
| 4501001 | 2022-10-31 | 0 | 0 |
| 4501003 | 2022-11-08 | 0 | 0 |
| 1301004 | 2022-09-25 | 1 | 1 |
| 1301003 | 2022-09-25 | 0 | 0 |
| 1301002 | 2022-09-24 | 0 | 0 |
| 1101002 | 2022-09-19 | 0 | 0 |
| 1101001 | 2022-09-06 | 1 | 1 |
| 1301017 | 2022-10-06 | 1 | 0 |







|   |   |
|---|---|
| 0 | 0 |
| 0 | 0 |
| 0 | 0 |
| 0 | 0 |
| 0 | 0 |
| 0 | 1 |
| 1 | 1 |
| 0 | 0 |
| 0 | 0 |
| 0 | 1 |
| 0 | 1 |
| 0 | 1 |
| 0 | 1 |
| 0 | 0 |
| 0 | 1 |
| 0 | 0 |
| 0 | 1 |
| 1 | 0 |
| 0 | 1 |
| 0 | 1 |
| 0 | 1 |
| 0 | 1 |
| 0 | 1 |
| 0 | 1 |
| 0 | 1 |
| 0 | 1 |
| 0 | 1 |
| 1 | 1 |
| 0 | 1 |
| 1 | 1 |
| 1 | 1 |
| 0 | 1 |
| 0 | 0 |
| 0 | 0 |
| 0 | 0 |
| 0 | 0 |
| 0 | 1 |
| 0 | 1 |
| 0 | 0 |
| 1 | 1 |
| 0 | 1 |
| 0 | 1 |
| 0 | 1 |
| 0 | 0 |
| 0 | 0 |
| 0 | 0 |
| 0 | 1 |
| 0 | 1 |
| 0 | 1 |
| 0 | 0 |
| 0 | 0 |
| 0 | 0 |
| 0 | 0 |
| 0 | 0 |
| 0 | 0 |
| 1 | 1 |
| 0 | 1 |
| 0 | 1 |













Reasons for not receiving the influenza or pneumonia vaccines

nonvaccine1  
nonvaccine1  
nonvaccine1  
nonvaccine1,nonvaccine5  
nonvaccine1  
nonvaccine1,nonvaccine5  
nonvaccine1  
nonvaccine1,nonvaccine8  
nonvaccine1,nonvaccine8  
nonvaccine1,nonvaccine8  
nonvaccine1  
nonvaccine1,nonvaccine8  
nonvaccine1,nonvaccine5  
nonvaccine1  
nonvaccine1,nonvaccine8  
nonvaccine1  
nonvaccine1  
nonvaccine1,nonvaccine5  
nonvaccine1  
nonvaccine1  
nonvaccine1  
nonvaccine1  
nonvaccine1  
nonvaccine1  
nonvaccine1,nonvaccine2,nonvaccine5  
nonvaccine1  
nonvaccine1  
nonvaccine1  
nonvaccine1  
nonvaccine1  
nonvaccine1,nonvaccine2  
nonvaccine1  
nonvaccine1  
nonvaccine1  
nonvaccine1  
nonvaccine1  
nonvaccine1  
nonvaccine1,nonvaccine5  
nonvaccine1  
nonvaccine1,nonvaccine5  
nonvaccine1  
nonvaccine1  
nonvaccine1  
nonvaccine1  
nonvaccine1,nonvaccine2  
nonvaccine1  
nonvaccine1,nonvaccine5  
nonvaccine7

Other reasons for not receiving the influenza or pneumonia vaccines

nonvaccine1  
nonvaccine4, nonvaccine5  
nonvaccine1, nonvaccine8  
nonvaccine2

nonvaccine1  
nonvaccine1  
nonvaccine5

nonvaccine1  
nonvaccine1

nonvaccine5  
nonvaccine1  
nonvaccine1  
nonvaccine1

nonvaccine1  
nonvaccine1  
nonvaccine5  
nonvaccine5  
nonvaccine1  
nonvaccine3  
nonvaccine1  
nonvaccine1  
nonvaccine1  
nonvaccine1  
nonvaccine1  
nonvaccine5  
nonvaccine5  
nonvaccine5  
nonvaccine5

nonvaccine1  
nonvaccine2  
nonvaccine1

nonvaccine1, nonvaccine8  
nonvaccine1  
nonvaccine1

nonvaccine3  
nonvaccine1  
nonvaccine1  
nonvaccine1  
nonvaccine1  
nonvaccine1  
nonvaccine1  
nonvaccine5

nonvaccine4, nonvaccine5  
nonvaccine4

nonvaccine1  
nonvaccine1  
nonvaccine1  
nonvaccine2  
nonvaccine1  
nonvaccine1

nonvaccine7

nonvaccine1

nonvaccine2  
nonvaccine2  
nonvaccine1  
nonvaccine5  
nonvaccine5

nonvaccine5  
nonvaccine4  
nonvaccine3  
nonvaccine5  
nonvaccine1  
nonvaccine5  
nonvaccine1  
nonvaccine1  
nonvaccine1  
nonvaccine1  
nonvaccine1  
nonvaccine1  
nonvaccine1  
nonvaccine1

nonvaccine3, nonvaccine4

nonvaccine1  
nonvaccine2, nonvaccine8

nonvaccine1  
nonvaccine3, nonvaccine7  
nonvaccine5  
nonvaccine1

nonvaccine1

nonvaccine1

nonvaccine1, nonvaccine6  
nonvaccine1, nonvaccine3  
nonvaccine1, nonvaccine8

nonvaccine1

nonvaccine1, nonvaccine4, nonvaccine8

nonvaccine1, nonvaccine4, nonvaccine7, nonvaccine8  
nonvaccine1, nonvaccine8

nonvaccine1, nonvaccine8  
nonvaccine1, nonvaccine4, nonvaccine8  
nonvaccine1, nonvaccine5, nonvaccine8

nonvaccine1, nonvaccine4, nonvaccine8  
nonvaccine1, nonvaccine4, nonvaccine7, nonvaccine8

nonvaccine1, nonvaccine4, nonvaccine8  
nonvaccine1, nonvaccine8, nonvaccine4  
nonvaccine1, nonvaccine8  
nonvaccine1, nonvaccine8  
nonvaccine5  
nonvaccine1, nonvaccine4, nonvaccine5, nonvaccine7, nonvaccine8

nonvaccine1, nonvaccine5, nonvaccine7, nonvaccine8  
nonvaccine2  
nonvaccine1, nonvaccine4, nonvaccine7, nonvaccine8  
nonvaccine1, nonvaccine8

nonvaccine2  
nonvaccine1  
nonvaccine1  
nonvaccine6, nonvaccine8  
nonvaccine6, nonvaccine8  
nonvaccine1, nonvaccine2  
nonvaccine1  
nonvaccine\_other

nonvaccine2  
nonvaccine1, nonvaccine8  
nonvaccine\_other  
nonvaccine1, nonvaccine4, nonvaccine8  
nonvaccine1, nonvaccine5, nonvaccine8  
nonvaccine2, nonvaccine1, nonvaccine8  
nonvaccine1, nonvaccine8  
nonvaccine1, nonvaccine8  
nonvaccine1, nonvaccine5, nonvaccine8

nonvaccine1, nonvaccine8  
nonvaccine1, nonvaccine8

nonvaccine1, nonvaccine4, nonvaccine8  
nonvaccine1, nonvaccine8  
nonvaccine1, nonvaccine2, nonvaccine8  
nonvaccine1, nonvaccine4, nonvaccine8  
nonvaccine1

nonvaccine1, nonvaccine8  
nonvaccine1, nonvaccine8, nonvaccine4  
nonvaccine7  
nonvaccine1  
nonvaccine1, nonvaccine8

nonvaccine1,nonvaccine8  
nonvaccine1,nonvaccine8  
nonvaccine1,nonvaccine8  
nonvaccine1  
nonvaccine1  
nonvaccine1  
nonvaccine1  
nonvaccine2  
nonvaccine1  
nonvaccine1  
  
nonvaccine1  
nonvaccine1  
nonvaccine1  
nonvaccine5  
nonvaccine5,nonvaccine7  
  
nonvaccine1,nonvaccine8  
nonvaccine1  
nonvaccine1  
nonvaccine1,nonvaccine2,nonvaccine8  
nonvaccine1  
nonvaccine1,nonvaccine8  
nonvaccine7  
  
nonvaccine1  
nonvaccine1,nonvaccine7,nonvaccine8,nonvaccine6  
nonvaccine1,nonvaccine8,nonvaccine2  
nonvaccine1,nonvaccine8  
nonvaccine1,nonvaccine8  
nonvaccine1,nonvaccine7,nonvaccine\_other,nonvaccine8  
nonvaccine1,nonvaccine8  
nonvaccine1,nonvaccine8  
  
nonvaccine1,nonvaccine8  
nonvaccine1,nonvaccine8  
nonvaccine1,nonvaccine8  
nonvaccine8  
nonvaccine1,nonvaccine8  
  
nonvaccine1,nonvaccine8,nonvaccine7  
  
nonvaccine1,nonvaccine2,nonvaccine8  
nonvaccine1,nonvaccine8  
nonvaccine1  
nonvaccine1  
nonvaccine1  
nonvaccine5  
  
nonvaccine\_other  
nonvaccine1  
nonvaccine1  
nonvaccine1  
nonvaccine1  
nonvaccine1  
nonvaccine1

No local requirement for vaccination

nonvaccine1  
nonvaccine1  
nonvaccine1  
nonvaccine1  
nonvaccine1  
nonvaccine\_other  
nonvaccine1  
nonvaccine3  
nonvaccine1  
nonvaccine1  
nonvaccine1  
nonvaccine1  
nonvaccine1  
nonvaccine1,nonvaccine7  
nonvaccine7  
nonvaccine1  
nonvaccine7  
nonvaccine1  
nonvaccine1,nonvaccine5  
nonvaccine1  
nonvaccine\_other  
nonvaccine1  
nonvaccine1  
nonvaccine1  
nonvaccine1  
nonvaccine5  
nonvaccine1  
nonvaccine\_other  
nonvaccine\_other  
nonvaccine1  
nonvaccine1  
nonvaccine1  
nonvaccine1  
nonvaccine2  
nonvaccine1  
nonvaccine1,nonvaccine7,nonvaccine8  
nonvaccine1,nonvaccine\_other,nonvaccine8  
nonvaccine1,nonvaccine8  
nonvaccine1,nonvaccine8  
nonvaccine1,nonvaccine8  
nonvaccine1,nonvaccine5,nonvaccine7,nonvaccine8  
nonvaccine1  
nonvaccine5  
nonvaccine7  
nonvaccine1  
nonvaccine\_other  
nonvaccine1,nonvaccine5,nonvaccine8  
nonvaccine1,nonvaccine8  
nonvaccine1,nonvaccine8  
nonvaccine1,nonvaccine8  
nonvaccine1,nonvaccine8  
nonvaccine1,nonvaccine8  
nonvaccine1,nonvaccine8  
nonvaccine1  
nonvaccine1  
nonvaccine1  
nonvaccine1  
nonvaccine1  
nonvaccine1  
nonvaccine1

Not recommended due to COPD at the time  
COPD

Renal insufficiency



nonvaccine1,nonvaccine8

nonvaccine1  
nonvaccine5

nonvaccine4

nonvaccine5

nonvaccine2  
nonvaccine1  
nonvaccine1  
nonvaccine1  
nonvaccine1

nonvaccine4,nonvaccine5

nonvaccine1,nonvaccine4

nonvaccine5  
nonvaccine1

nonvaccine1  
nonvaccine5

nonvaccine4

nonvaccine5,nonvaccine6

nonvaccine4

nonvaccine6,nonvaccine8

nonvaccine2  
nonvaccine1

nonvaccine4,nonvaccine6

nonvaccine6  
nonvaccine2

nonvaccine1,nonvaccine8

nonvaccine1,nonvaccine6,nonvaccine7,nonvaccine8

nonvaccine1,nonvaccine7,nonvaccine8

nonvaccine6,nonvaccine4,nonvaccine5

nonvaccine1

nonvaccine3

nonvaccine5,nonvaccine\_other

nonvaccine1

Health center advised against vaccination

nonvaccine1

nonvaccine1

nonvaccine1

nonvaccine1,nonvaccine8

nonvaccine1,nonvaccine8

nonvaccine1,nonvaccine7,nonvaccine8

nonvaccine2

nonvaccine2

nonvaccine2

nonvaccine2

nonvaccine1

nonvaccine1

nonvaccine1

nonvaccine1, nonvaccine2

nonvaccine1

nonvaccine2

nonvaccine2

nonvaccine1

nonvaccine1

nonvaccine1

nonvaccine3

nonvaccine5

nonvaccine5, nonvaccine\_other

nonvaccine1

Community doctor said vaccination was not yet possible

nonvaccine1, nonvaccine7, nonvaccine8

nonvaccine1, nonvaccine8

nonvaccine5

nonvaccine1, nonvaccine8

nonvaccine5

nonvaccine1, nonvaccine3

nonvaccine1

nonvaccine1

nonvaccine1, nonvaccine8

nonvaccine1, nonvaccine8

nonvaccine5, nonvaccine4

nonvaccine1

nonvaccine1

nonvaccine1

nonvaccine1

nonvaccine3, nonvaccine5

nonvaccine1, nonvaccine3, nonvaccine7, nonvaccine4, nonvaccine8

nonvaccine1, nonvaccine2, nonvaccine8

nonvaccine1, nonvaccine3, nonvaccine2

nonvaccine1, nonvaccine2, nonvaccine3, nonvaccine5, nonvaccine6, nonvaccine7, nonvaccine8, nonvaccine4

nonvaccine1, nonvaccine3, nonvaccine8, nonvaccine7

nonvaccine5

nonvaccine1

nonvaccine1  
nonvaccine1  
nonvaccine1, nonvaccine8  
nonvaccine1, nonvaccine2, nonvaccine8  
nonvaccine1  
nonvaccine1

nonvaccine1, nonvaccine8  
nonvaccine1, nonvaccine8  
nonvaccine1, nonvaccine8

nonvaccine1  
nonvaccine1  
nonvaccine1  
nonvaccine1  
nonvaccine4  
nonvaccine1

nonvaccine5  
nonvaccine1, nonvaccine3, nonvaccine8  
nonvaccine1, nonvaccine8  
nonvaccine1  
nonvaccine1

nonvaccine1, nonvaccine8  
nonvaccine1, nonvaccine8  
nonvaccine1  
nonvaccine1  
nonvaccine1, nonvaccine6, nonvaccine8  
nonvaccine4  
nonvaccine1, nonvaccine8  
nonvaccine4  
nonvaccine3, nonvaccine8

nonvaccine5  
nonvaccine\_other  
nonvaccine1, nonvaccine8  
nonvaccine1, nonvaccine7, nonvaccine8

Primary care doctor advised waiting for now

nonvaccine1  
nonvaccine1, nonvaccine8  
nonvaccine5  
nonvaccine3, nonvaccine2  
nonvaccine5
