# Supplementary material
Source: publisher site journal article supplement (https://www.dovepress.com/article/566403)
Supplement: Supplementary file 3 [file 566403 Supplementary Material 4.pdf › 566403 Supplementary Material 4.pdf]

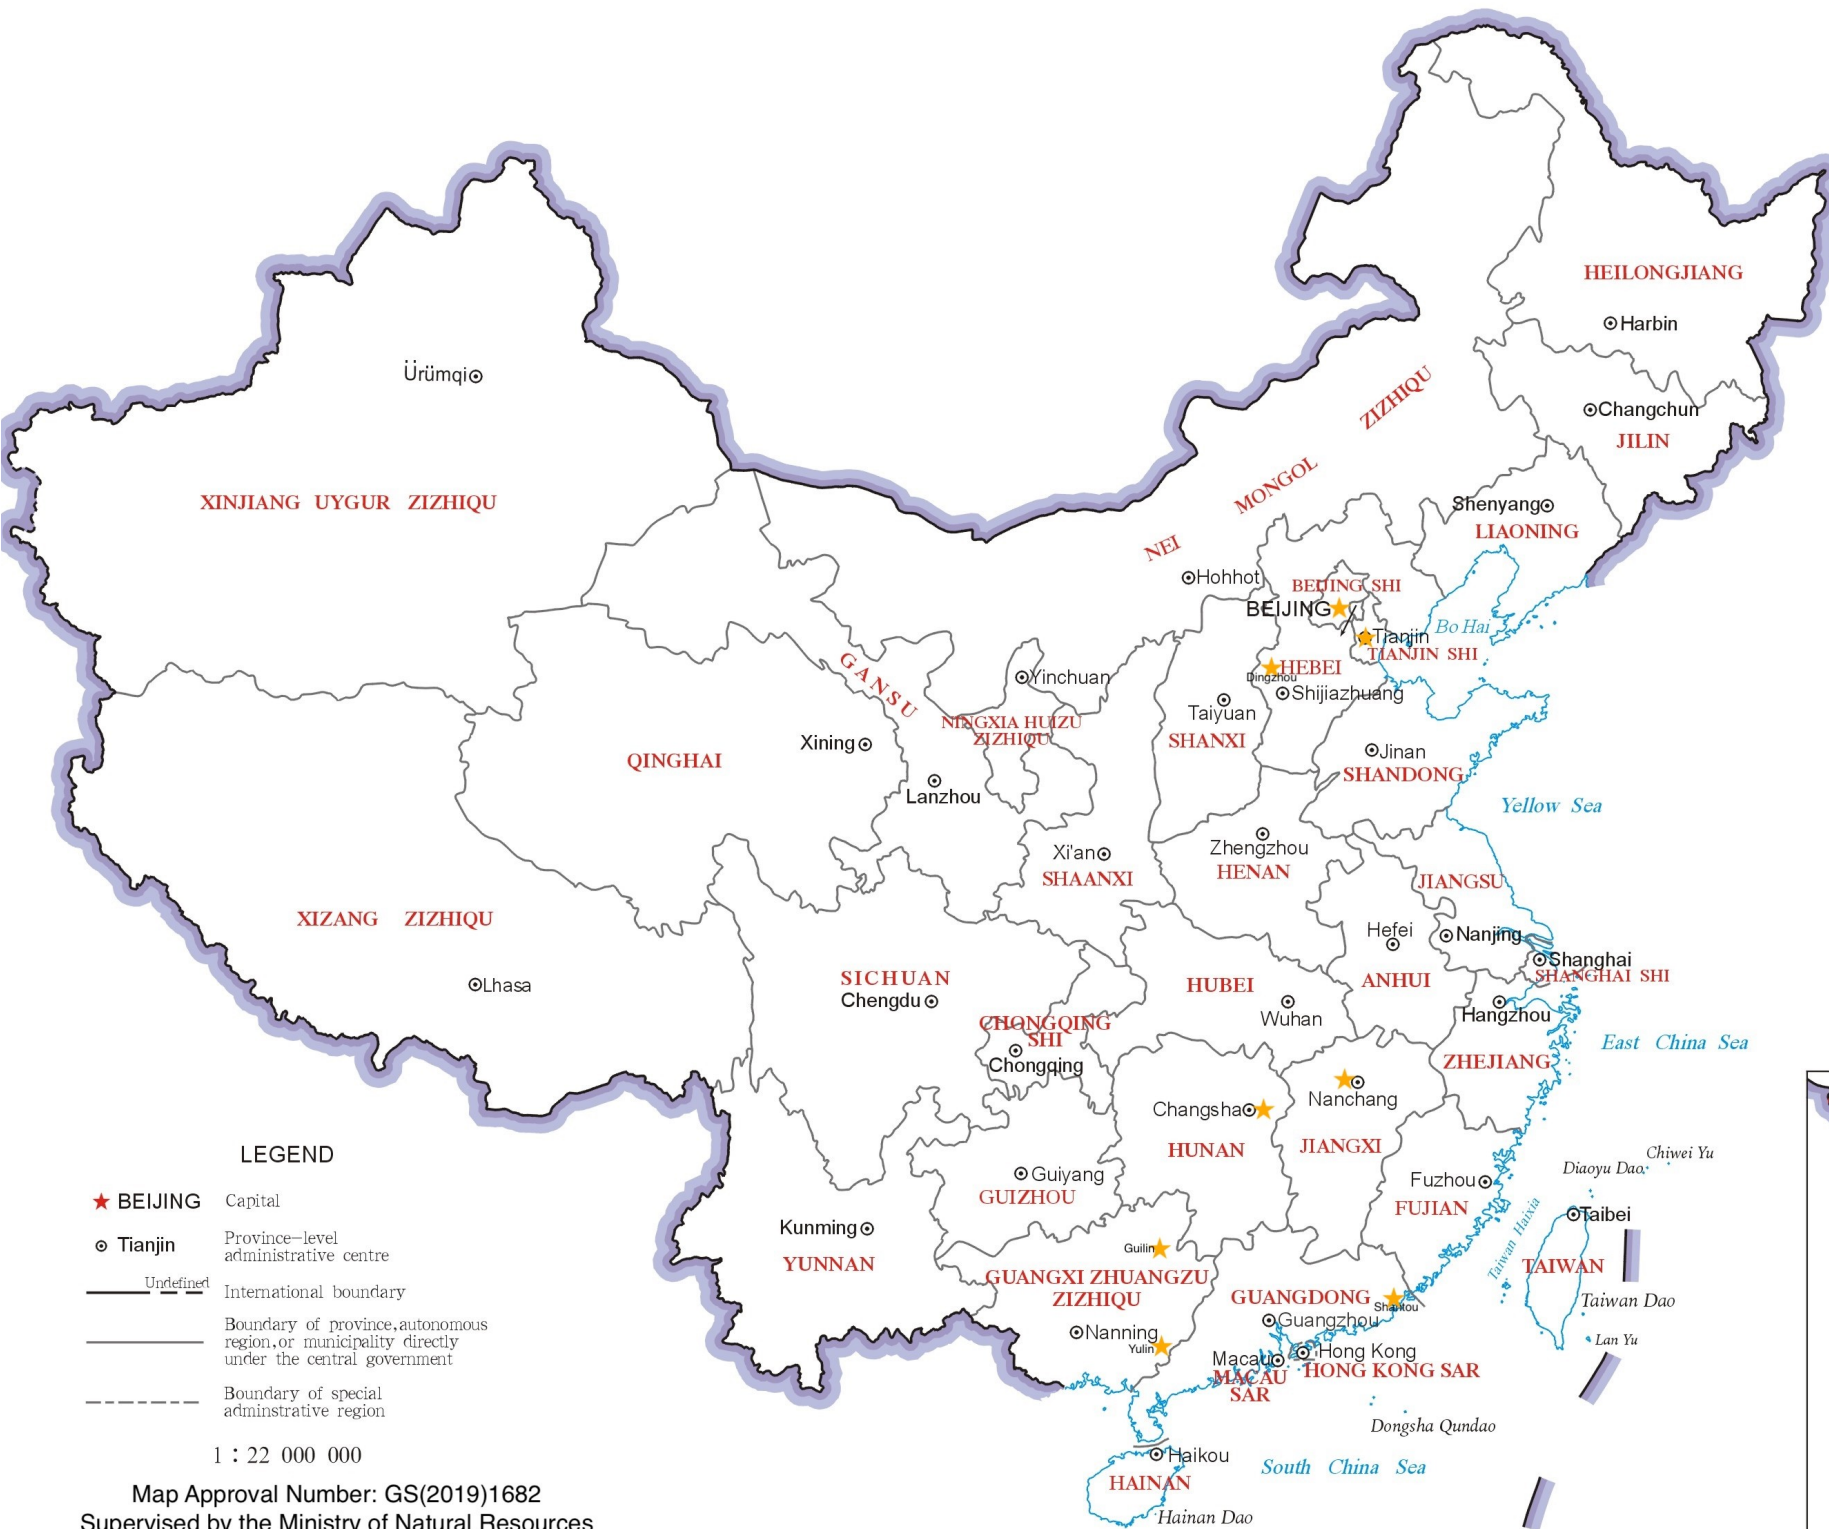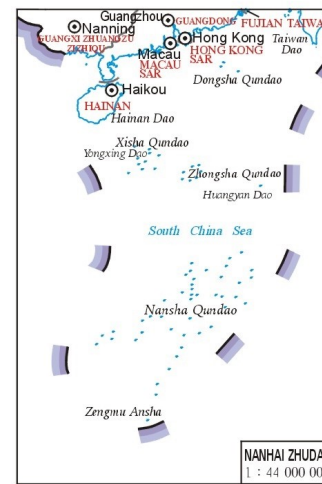

**LEGEND**

- ★ BEIJING Capital
- ⊙ Tianjin Province-level administrative centre
- Undefined International boundary
- Boundary of province, autonomous region, or municipality directly under the central government
- - - Boundary of special administrative region

1 : 22 000 000

Map Approval Number: GS(2019)1682  
 Supervised by the Ministry of Natural Resources

NANHAI ZHUDAO  
 1 : 44 000 000
